# Supplementary material for: Treadmilling analysis reveals new insights into dynamic FtsZ ring architecture
Source: PubMed Central journal article supplement (PMC5979038; doi:10.1371/journal.pbio.2004845), 2018-05-18
Supplement: pbio.2004845.s012.pdf [file pbio.2004845.s012.pdf]

1 **SUPPLEMENTAY METHODS**  
2  
3

4 **Sedimentation velocity.** Sedimentation velocity analysis of FtsZ-YFP-mts was performed  
5 at 0.5 g/L protein concentration in 50 mM Tris-HCl, 150 mM KCl, 5 mM MgCl<sub>2</sub>, pH 7.5  
6 buffer. The experiments were carried out at 38,000 rpm and at 20 °C in an XL-I analytical  
7 ultracentrifuge (Beckman-Coulter Inc.) equipped with a UV-VIS detection system, an An-  
8 50 Ti rotor and 12 mm double-sector centerpieces. Sedimentation profiles were registered  
9 every 5 min. The sedimentation coefficient distributions were calculated by least-squares  
10 boundary modeling of sedimentation velocity data using the c(s) method as implemented  
11 in the SEDFIT program (Schuck, P., 2000). These S-values were corrected to standard  
12 conditions (water, 20 °C and infinite dilution) to get the corresponding standard s<sub>20,w</sub>  
13 using the software SEDNTERP (Holde, v.E.v.,1985). The frictional ratio, f/f<sub>0</sub>, was  
14 calculated for the monomer using this software.

15 **GTPase activity.** FtsZ GTPase activity was determined using the BIOMOL GREEN  
16 reagent for phosphate detection (Enzo). In brief FtsZ at 5 μM concentration is measured  
17 every 20 seconds after adding 1 mM GTP for a total of 7 time points. After 15 minutes of  
18 incubation with Biomol Green, the samples are measured OD<sub>620nm</sub>. The data is later fit to a  
19 standard curve of 40 μM phosphate.  
20  
21  
22

23 Schuck, P., Size-distribution analysis of macromolecules by sedimentation velocity  
24 ultracentrifugation and lamm equation modeling. Biophys J, 2000. 78(3): p. 1606-19.

25 Holde, v.E.v., Sedimentation. Physical biochemistry 2 edit. Prentice-Hall, Englewood Cliffs,  
26 NJ., 1985: p. 110-136.  
27  
28  
29  
30  
31  
32  
33  
34  
35  
36  
37  
38
